# Supplementary material
Source: PubMed Central journal article supplement (PMC2366865)
Supplement: mbc_E08-02-0110_1.pdf [file mbc_E08-02-0110_1.pdf]

## **E08-02-0110 Hoflack**

**Figure S1.** Electron microscopy profiles of AP-3-coated liposomes. Liposomes with (A) LIMP-II wt tails or (B) no cytoplasmic domains, obtained under standard conditions and purified on density gradient, were fixed and processed for electron microscopy. Magnification: 44k.

**Figure S2.** Protein profile of AP-3 coated liposomes. Liposomes containing LIMP II and PI-3P (LIMP IIwt/PI3P) or liposomes devoid of these components (-/-) were incubated with cytosol and GTP- $\gamma$ -S, then purified by floatation on density gradient and analyzed on 7% and 15% SDS-PAGE. The different lanes stained by Coomassie brilliant blue were scanned. The black line represents the reconstituted protein profile of liposomes with LIMP II and PI-3P whereas the gray line represents that of liposomes without these membrane components. The lanes were cut into 50 slices that were analyzed by mass spectrometry.

**Figure S3.** Efficiencies of siRNA-mediated interference with molecules associated with AP-3-coated liposomes. Cells were transfected for 72h with control non-targeting siRNAs (siNon) or with siRNAs against (A) AP-3 $\delta$ , (B) PI-4KII $\alpha$ , (C)  $\beta$ -PIX or (D) AP-1 $\gamma$ . Non-transfected cells were also included as a control C. Cells were further harvested and analyzed by Western blot using antibodies against the respective proteins, using tubulin as a loading control.

**Figure S4.** LAMP-1 sorting in siRNA-treated cells. Non-targeting (A) (siNon), (B) AP-3 (siAP3) or (C) Big1 (siBIG1)-treated HeLa cells expressing GFP-MPR were incubated with anti LAMP-1 antibodies for 4h, fixed, permeabilized and labeled with the secondary antibody (red) and with DAPI nuclear staining (blue), and then analyzed by confocal fluorescence microscopy. Scale bars, 20  $\mu$ m.

**Figure S5.** GFP-MPR sorting in siRNA-treated cells. Cells expressing GFP-MPR transfected for 72h with siRNAs against the indicated molecules or with control nontargeting siRNAs (siNon) were incubated for 4h with anti-GFP, then fixed, permeabilized and labeled with secondary antibodies (red) and analyzed by fluorescence confocal microscopy. Scale bars, 10  $\mu$ m.

**Figure S6.** AP-1 localization in siRNA-treated cells. Cells expressing GFP-MPR transfected for 72h with siRNAs against the indicated molecules or with control nontargeting siRNAs (siNon) were fixed, permeabilized and labeled with antibodies against the AP-1 $\gamma$  (red) and analyzed by fluorescence confocal microscopy. Scale bars, 10  $\mu$ m.

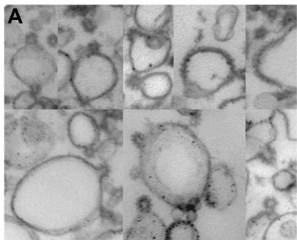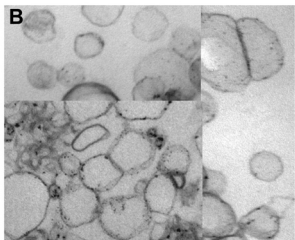

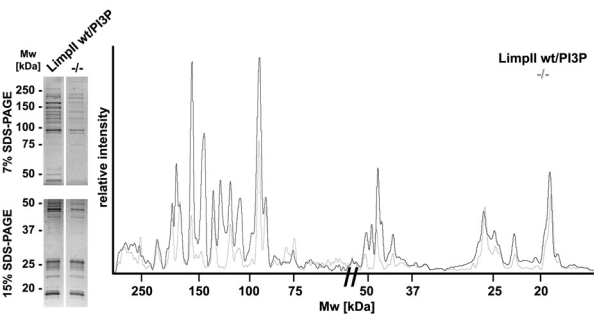

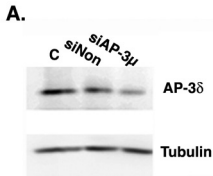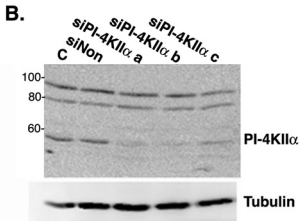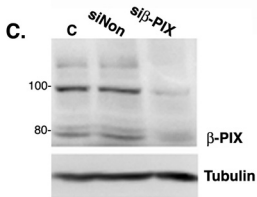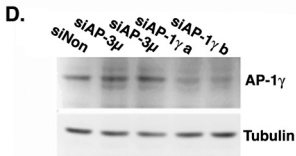

**Fig. S3**

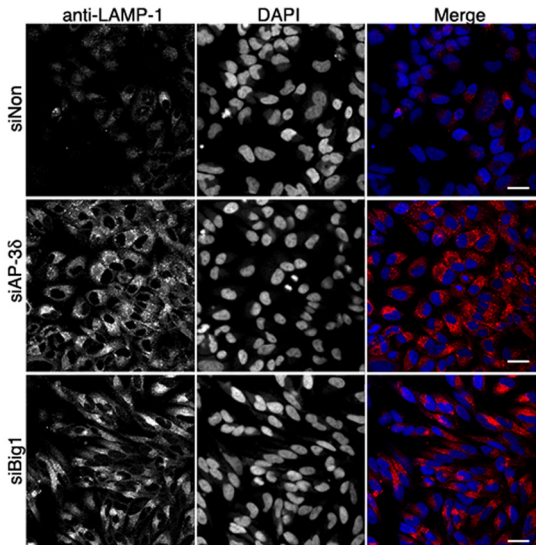

**Fig. S4**

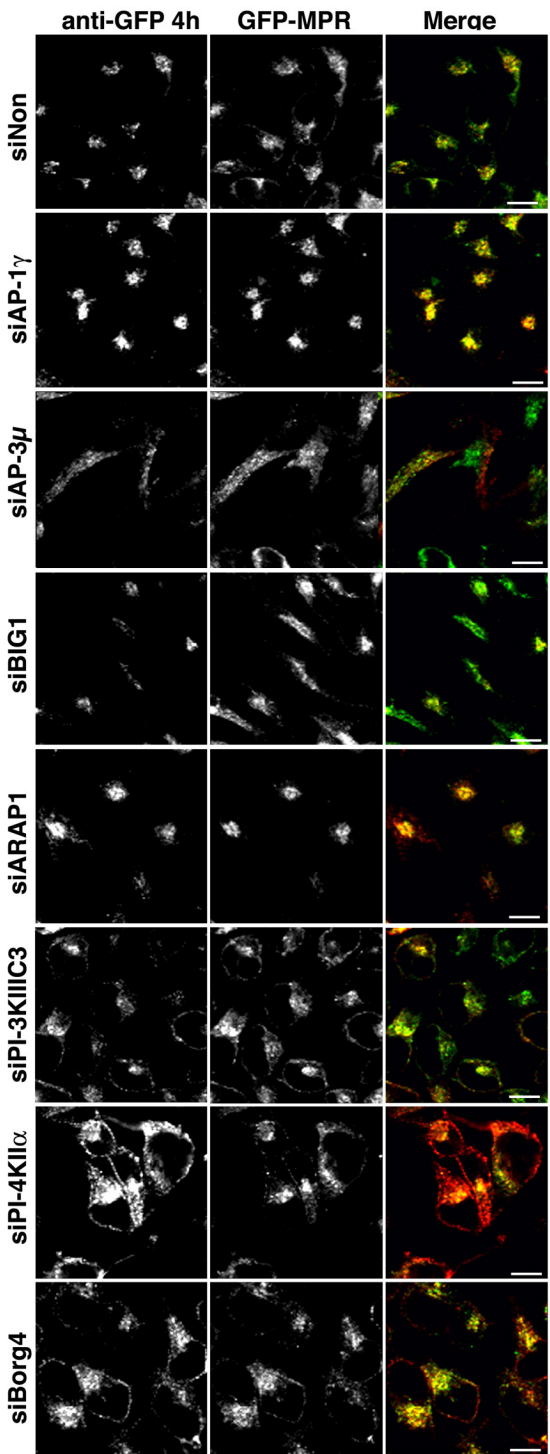

**Fig. S5**

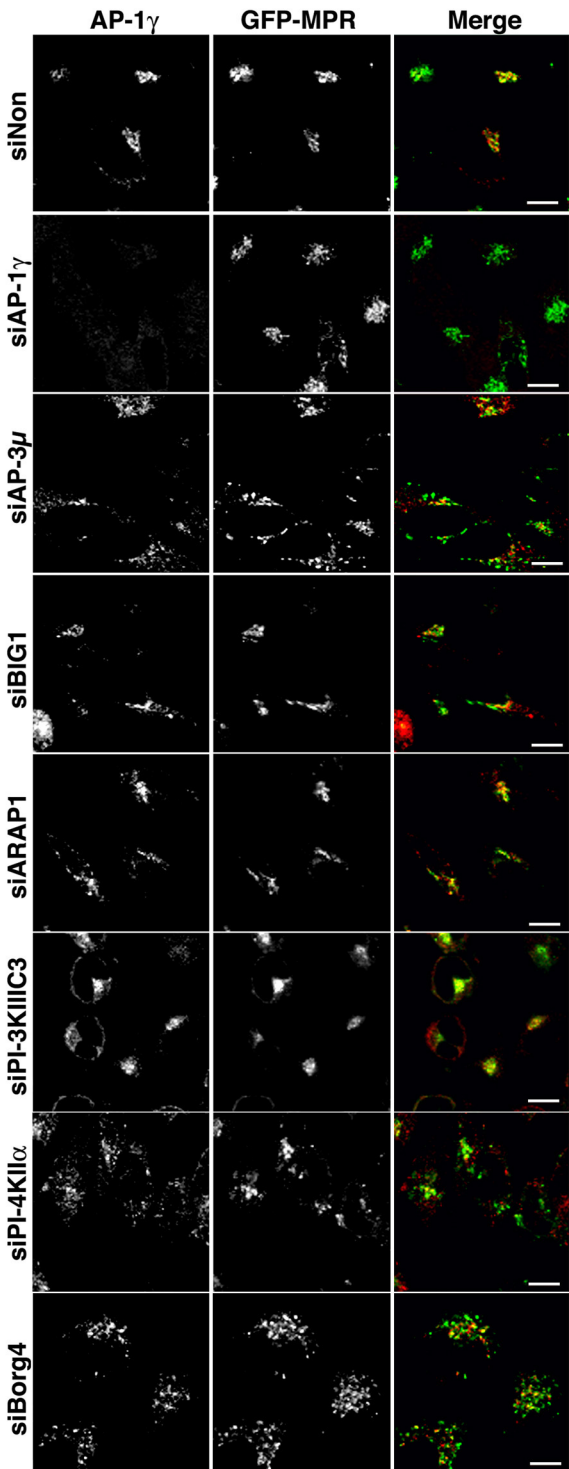

**Fig. S6**
